# Supplementary material for: Carboxylate complexation by a family of easy-to-make ortho-phenylenediamine based bis-ureas: studies in solution and the solid state
Source: Royal Society of Chemistry journal article supplement (doi:10.1039/b511963d), 2005-11-28

## Carboxylate complexation by a family of easy-to-make *ortho*-phenylenediamine based bis-ureas: studies in solution and the solid state

Simon J. Brooks, Peter R. Edwards, Philip A. Gale\* and Mark E. Light

Electronic supplementary information:  $^1\text{H}$  NMR titration curves:

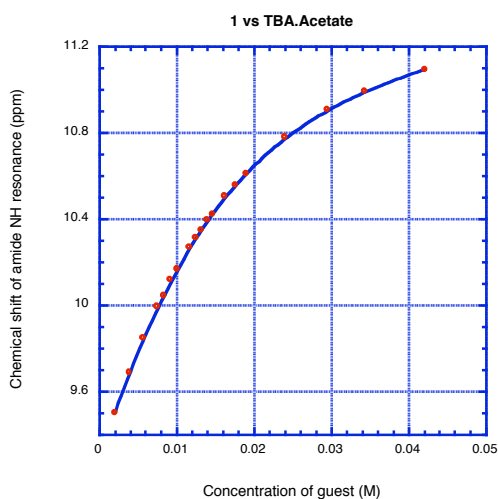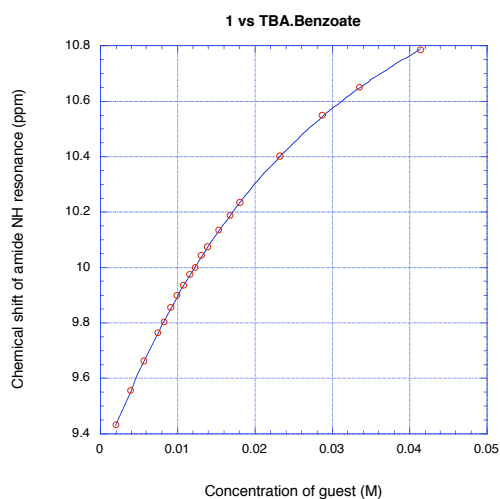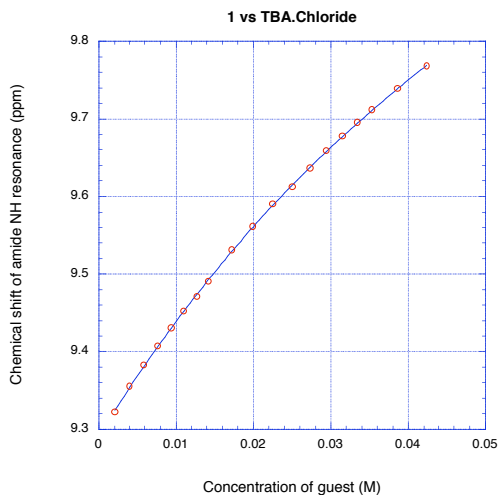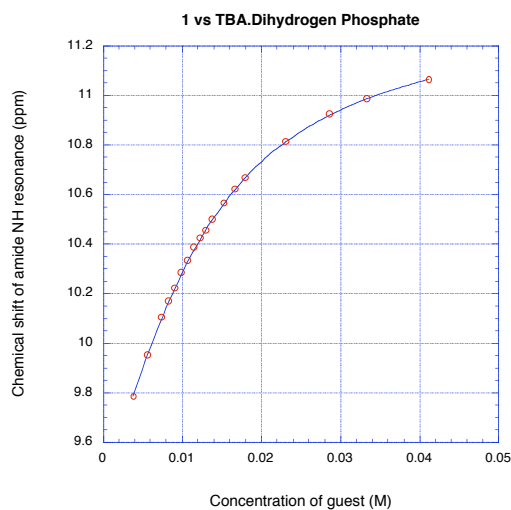

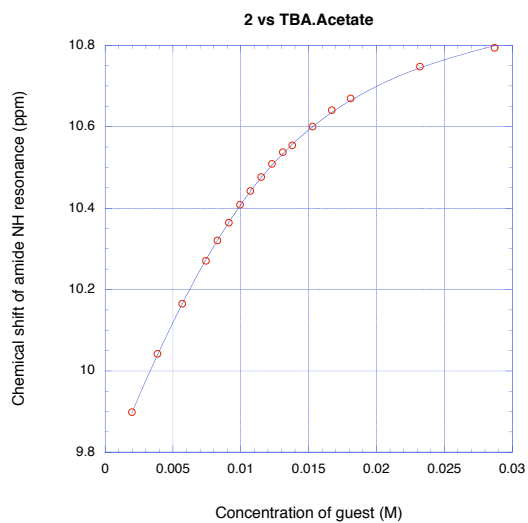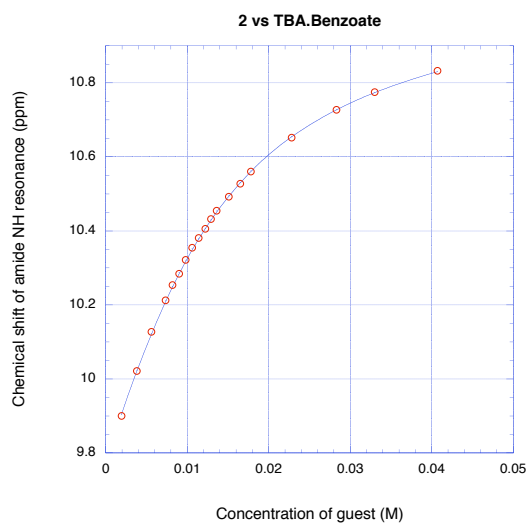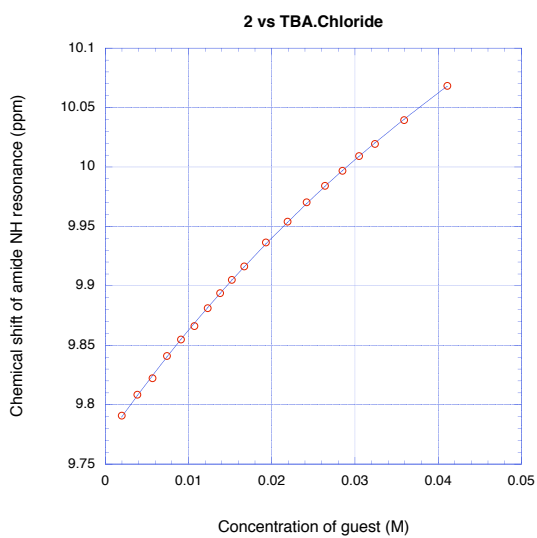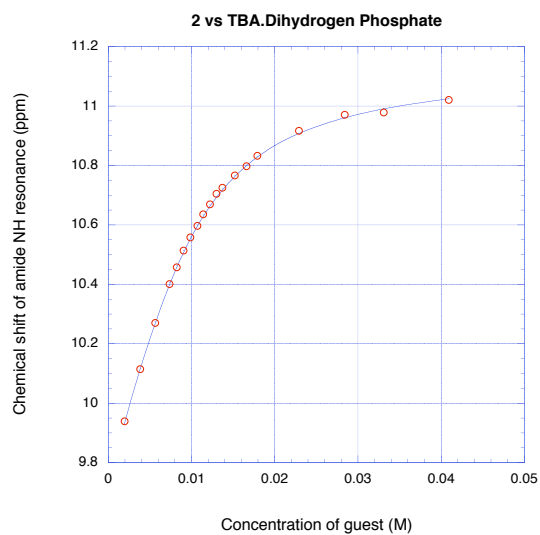

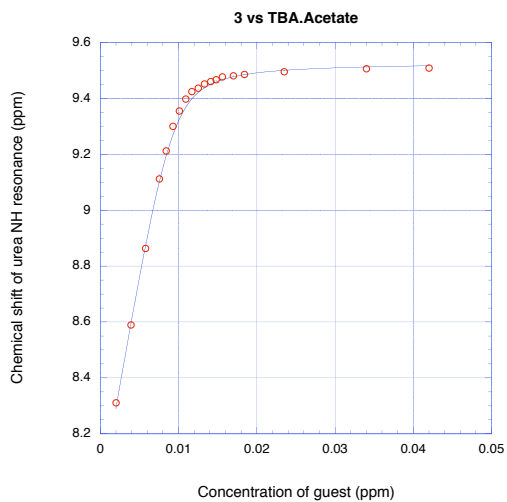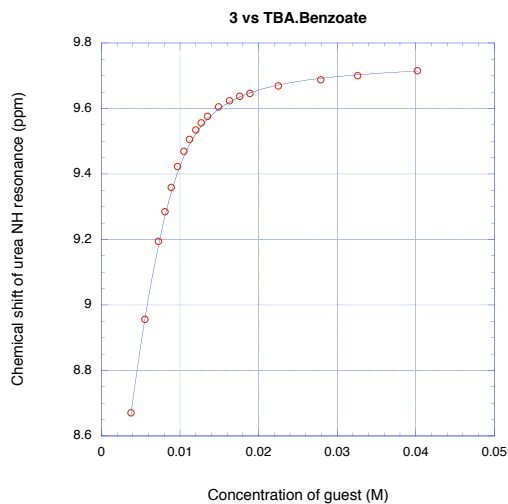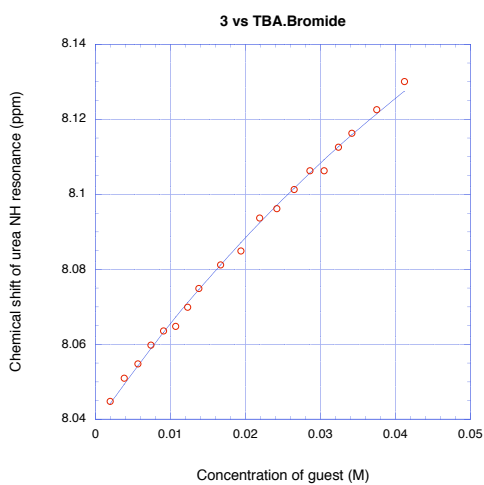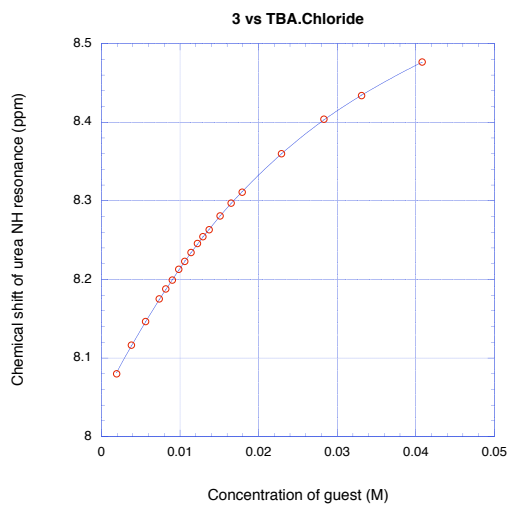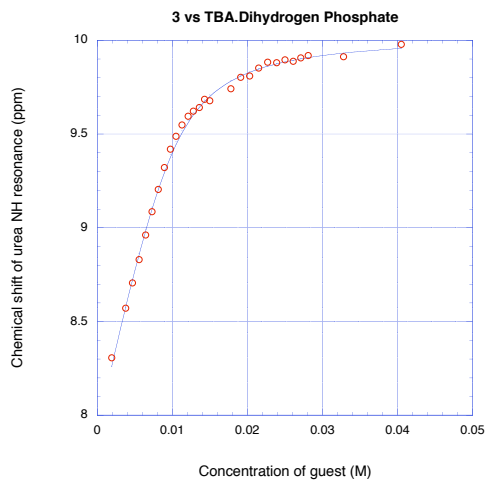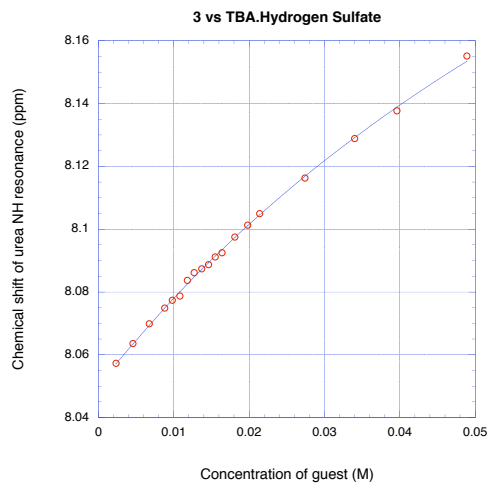

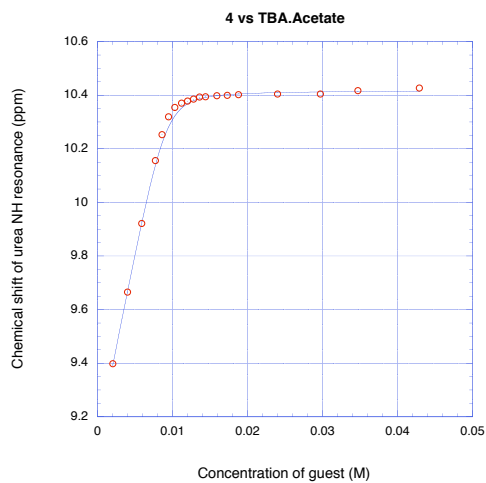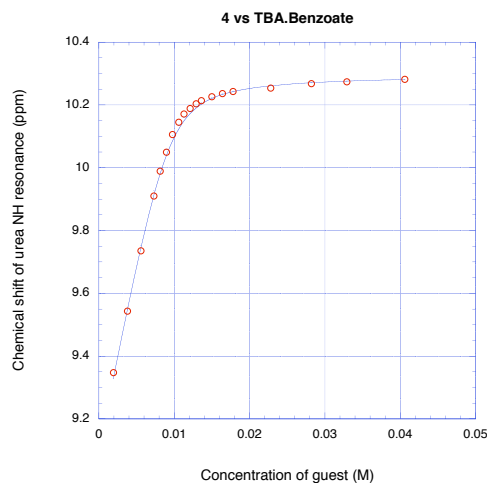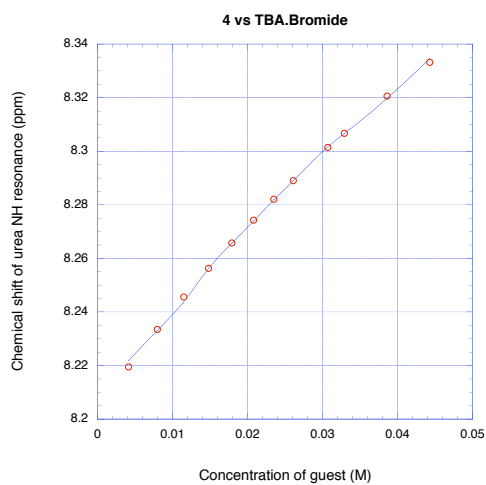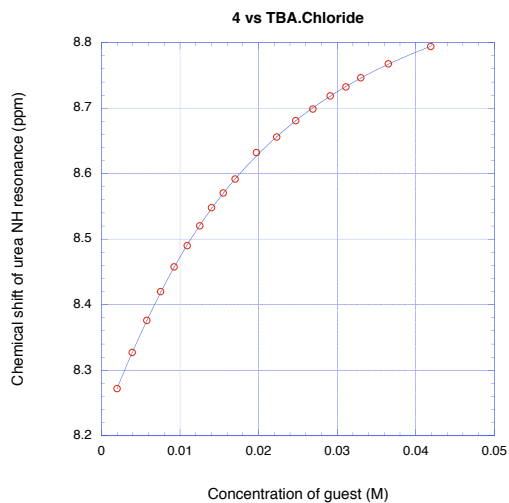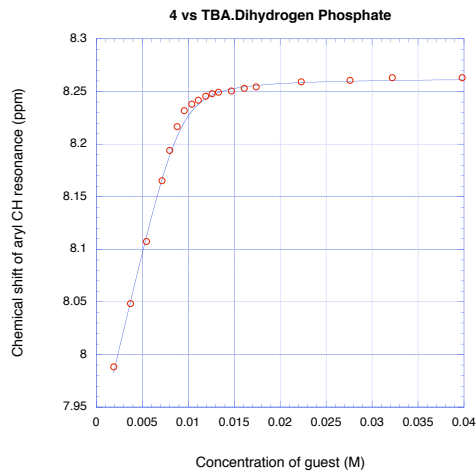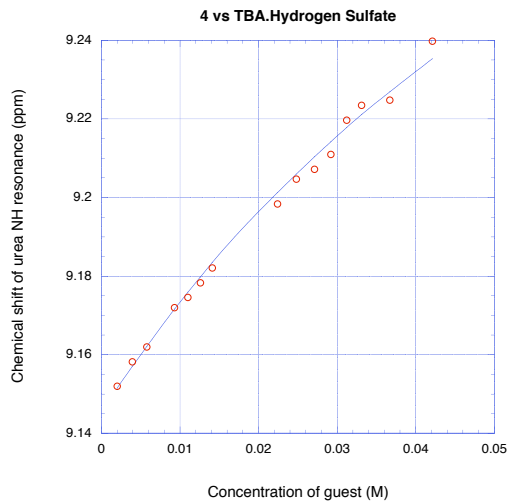

# Supplementary Material (ESI) for New Journal of Chemistry  
# This journal is © The Royal Society of Chemistry and  
# The Centre National de la Recherche Scientifique, 2005

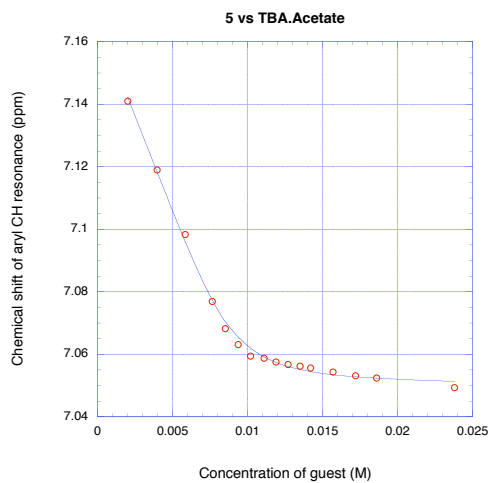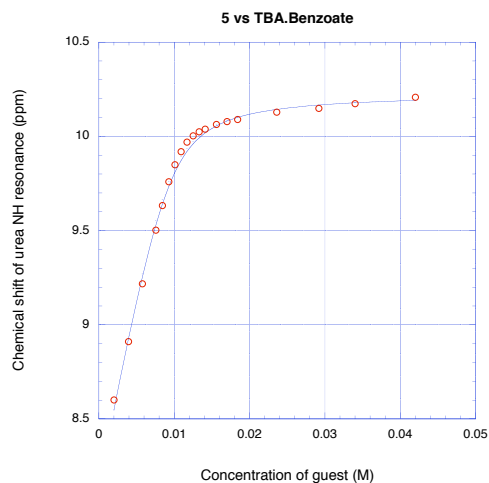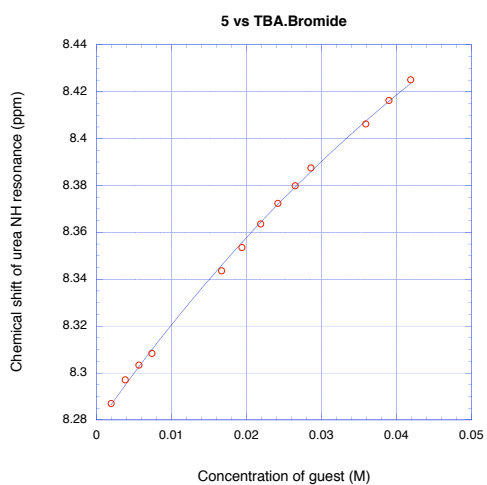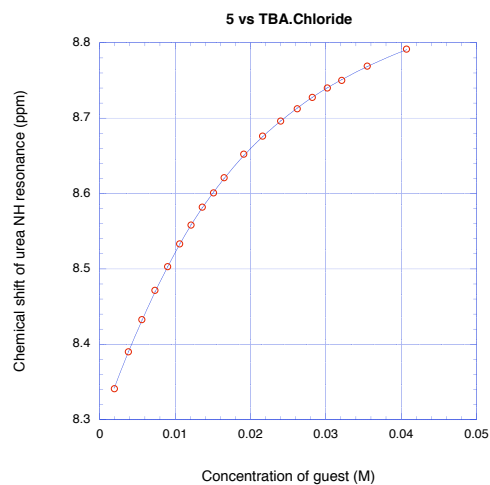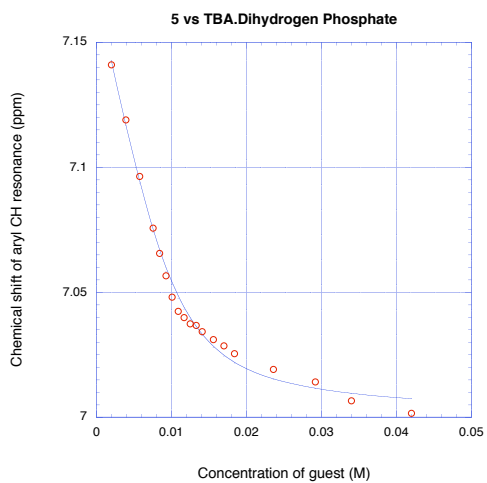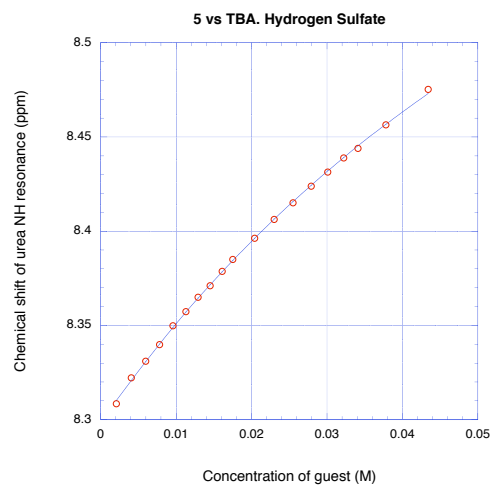

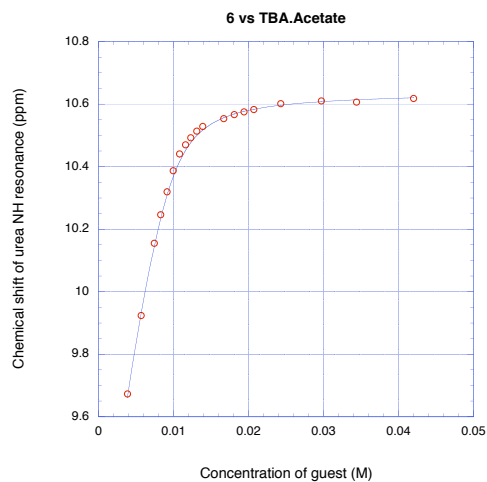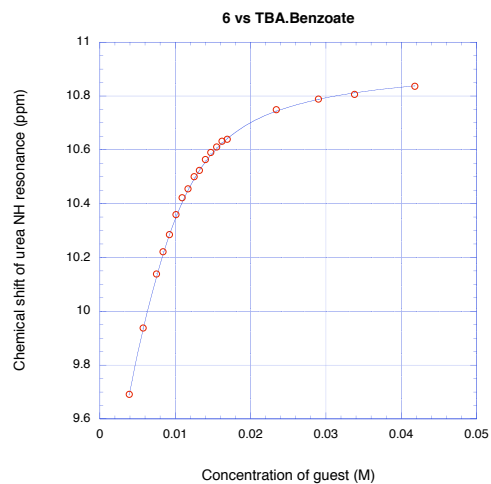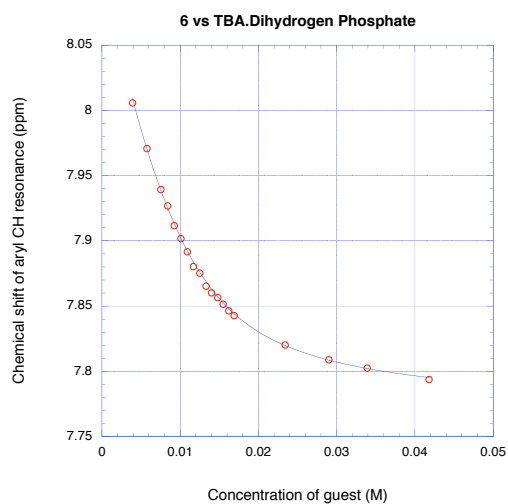

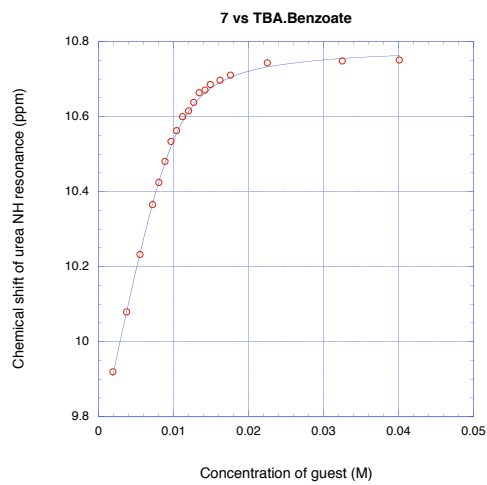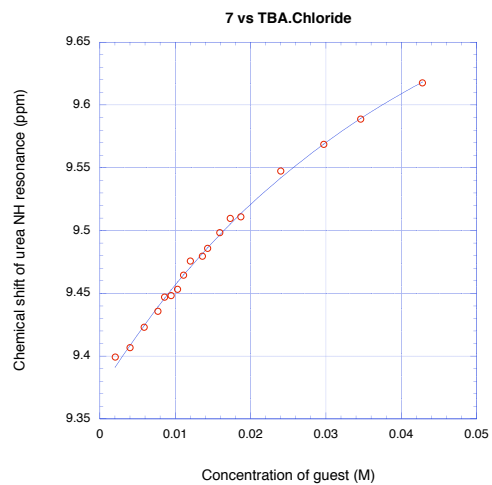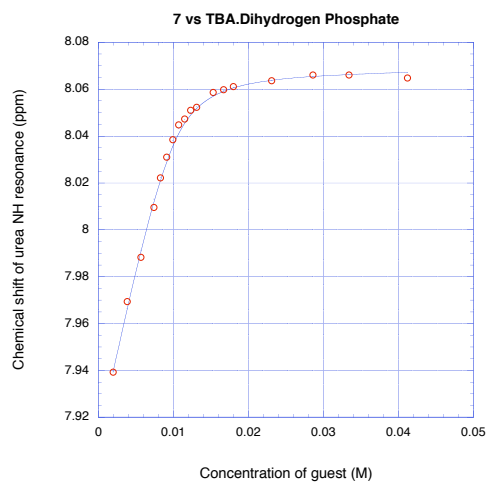

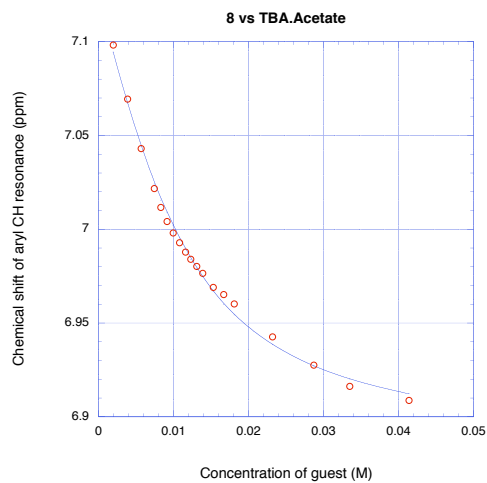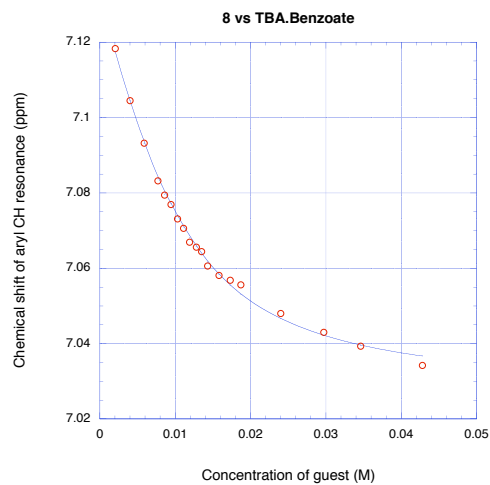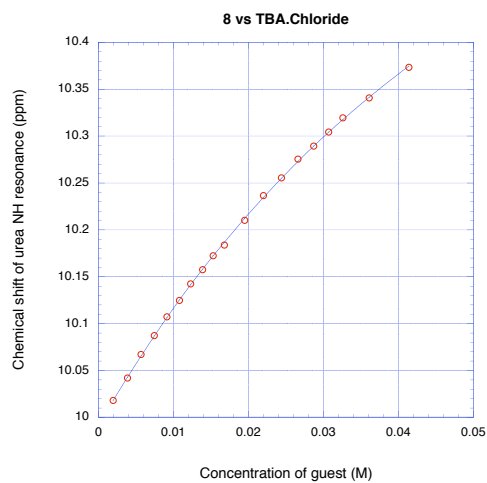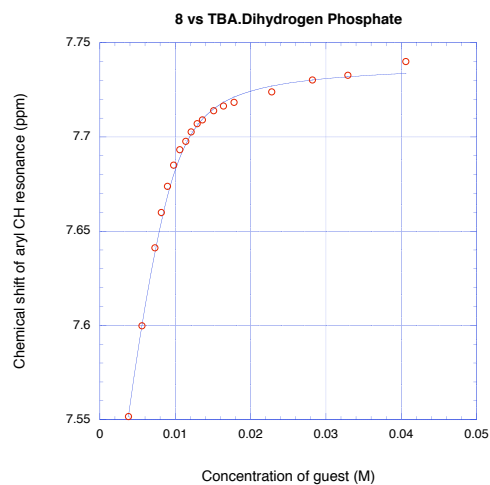

Supplement: b511963d.pdf [file b511963d.pdf]
